# Supplementary material for: Near-Complete Phosphorus Recovery from Challenging Water Matrices Using Multiuse Ceramsite Made from Water Treatment Residual (WTR)
Source: Research Square preprint supplement (doi:10.21203/rs.3.rs-4558561/v1), 2024-06-12
Supplement: Supplementary file 1 [file 9893d8b44b3bde5d74a008f2.doc]

**Supplementary** **Information**

**Near-Complete Phosphorus Recovery from Challenging Water Matrices Using Multiuse Ceramsite Made from Water Treatment Residual (WTR)**

Jianfei Chen1, Jinkai Xue1, *, Jinyong Liu2, Seyed Hesam-Aldin Samaei1, Leslie J. Robbins3

1Cold-Region Water Resource Recovery Laboratory (CRWRRL), Environmental Systems Engineering, Faculty of Engineering & Applied Science, University of Regina, Regina, SK S4S 0A2, Canada

2Department of Chemical & Environmental Engineering, University of California, Riverside, California 92521, United States

3Department of Geology, University of Regina, Regina, SK S4S 0A2, Canada

* Correspondent author: J. Xue, [jinkai.xue@uregina.ca](mailto:jinkai.xue@uregina.ca)

The supplement includes:

| Pages | 18 |
| --- | --- |
| Texts | 8 |
| Figures | 8 |
| Tables | 8 |
| References | 37 |

# Text S1. Materials and chemicals

Bentonite clay, potassium phosphate (KH2PO4, ≥99%), humic acid sodium salt (HA, 50 – 60%), sodium hydroxide (NaOH, 99.3%), hydrochloric acid (HCl, 20% v/v), and nitric acid (HNO₃, 70%) were purchased from Thermo Fisher Scientific (Ontario, Canada). Sodium chloride (NaCl, ACS grade), sodium fluoride (NaF, 99%), sodium sulfate (Na2SO4, ACS grade), sodium chloride (NaCl, ACS grade), and sodium bicarbonate (NaHCO3, ACS grade) were provided by VWR Chemicals (Ohio, USA). All the experiments were conducted in duplicate and reverse osmosis (RO) water was used only.

# Text S2. Measurements of chemical oxygen demand (COD), NH4+, and NO3- in units of mg/L.

Prior to the experiment, the domestic wastewater was filtered through 0.45-μm mixed cellulose esters syringe membranes and diluted if necessary. Characterization of COD, NH4+, and NO3− for the wastewater was carried out using HACH DR3900 spectrophotometer, which were determined using USEPA reactor digestion method (Method 8000, 620nm), salicylate method (Method 10031, 655 nm), and chromotropic acid method (Method 10020, 410 nm), respectively.

HA concentration was measured in a UV-vis spectrophotometer (DS-11 FX+, DeNovix Inc., USA) using 1 cm quartz cells at 280 nm. The UV absorptivity at 280 nm represents total aromaticity of samples. The HA calibration curve ranged from 1 to 40 mg/L and was plotted (Figure S 1A**)**. The linear regression was 0.9992, which is adequate for recalculating HA concentration (mg/L) based on absorbance intensity. Moreover, HA concentrations of all samples were measured at least five times to ensure the stability of the absorbance intensity in each cell. Also, duplicate samples were prepared.

# Text S3. Experimental details of adsorption kinetics, isotherms, and thermodynamics.

**Adsorption kinetics:**

To better understand the adsorption mechanisms, the adsorption kinetics of phosphate were evaluated by four widely applied kinetic models: (1) pseudo-first-order model (PFO), (2) pseudo-second-order model (PSO), (3) Elovich model, and (4) intra-particle diffusion model (IPD) 1. The equations of which are shown as:


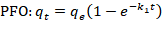
 (S1)


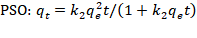
 (S2)


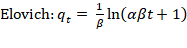
 (S3)


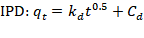
 (S4)

Where, qt is the adsorption capacity (mg/g) at time t; k1 and k2 are the constant rate for PFO model (hr-1) and PSO model (g/(mg·hr)), respectively;  (mg/(g·hr)) is the initial adsorption rate, and ꞵ (g/mg) is the desorption constant in Elovich model; kd is the intraparticle diffusion coefficient (mg/(g·hr0.5)); and Cd is the constant related to boundary layer thickness (mg/g), while a zero or close-to-zero value of Cd implies a minimal effect on the boundary layer.

**Adsorption isotherms:**

The adsorption efficiency and adsorption capacity at equilibrium (qe, mg PO43-/g) were calculated using Eq. (S5) and (S6), respectively, as follows:


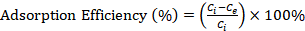
 (S5)


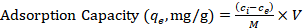
 (S6)

Where, Ci and Ce are the initial concentration of phosphate (mg PO43-/L) and concentration at any given time t, respectively; M is the mass of the adsorbent (g); and V is the volume of solution (L).

Three adsorption isotherm models (i.e., Langmuir, Freundlich, and Sips) were applied, given by Eq. S7 – S9, respectively.


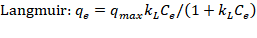
 (S7)


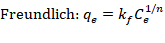
 (S8)


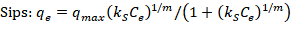
 (S9)

Where, qmax is the theoretical maximum adsorption capacity (mg/g); Ce is the adsorbate concentration in the aqueous phase at equilibrium (mg/L); kL and kf are the Langmuir’s isotherm constant (L/mg) and Freundlich’s isotherm constant (mg·L1/n/(g· mg1/n)), respectively; n is a constant of the Freundlich model, which is concerned with the surface heterogeneity, indicating the adsorption intensity; kS is the Sips constant associated with adsorption affinity (L/mg); and m is a constant dimensionless parameter accounting for the heterogeneity of the adsorption system.

**Adsorption thermodynamics:**

Three thermodynamic parameters (i.e., change in the Gibbs free energy, ΔG⁰ (kJ/mol), enthalpy, ΔH⁰ (kJ/mol), and entropy, ΔS⁰ (J/(mol·K)), were calculated to investigate the nature of PO43- adsorption process by Eq. S10 – S11 as follows 2:


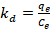
 (S10)


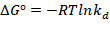
 (S11)

Where, kd is the thermodynamic equilibrium constant of the adsorption process, R and T refer to the gas constant (8.314 J/(mol·K)) and temperature (K), respectively.

The values of ΔH⁰ and ΔS⁰ can be evaluated using van’t Hoff equation as follows:


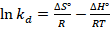
 (S12)

Thus, the slope and intercept of the linear plot of *ln (kd)* vs. *1/T* can be used to determine the values of ΔH⁰ and ΔS⁰.

# Text S4. Ceramsite optimization and selection.

The k value signifies the average value of SSA results of the same factor, and the range value (R) represents the difference between the minimum and maximum of the average values at the same level. A larger R-value indicates a more significant impact of this factor on SSA, suggesting that this factor is the primary contributor. Also, signal and noise (S/N) ratio defined as the ratio of mean to standard deviation.3 Based on the orthogonal experiment (**Table S1**), the R values were as follows: RC1=28.575, RC2=3.607, RC3=4.326, RC4=4.867, RC5=25.696, and RC6=3.256. Hence, the range analysis indicated that mass ratio (C1) was the most important factor, followed by sintering temperature (C5), sintering time (C4), preheating temperature (C3), preheating time (C2), and heating rate (C6) (**Table S2**). Similar results can be obtained from S/N ratio analysis, indicating mass ratio and sintering temperature are the most significant factors. The mass ratio was the most significant factor in the fabrication process, as a higher percentage of Al-WTR introduced more organic matter into the mixture, resulting in increased gas release and leading to a more porous structure. The sintering temperature also played an essential role in forming the porous structure of ceramsite. The SSA significantly declined with increasing sintering temperature due to an over-formation of the liquid phase, which is consistent with previous studies.4 Meanwhile, the preheating temperature and sintering time also manifested a slightly adverse impact.

# Text S5. Material characterization.

The BET-SSA, pore distribution, and pore volume of the ceramsite were determined using a N2 adsorption instrument at 77.35 K (Autosorb iQ, Quantachrome, USA). Point of zero charge (pHPZC) was measured using the pH drift method, identifying the intersection where the initial pH equals the final pH,5 and the result was confirmed with a Malvern Zetasizer Advance Lab (Malvern Instrument Ltd., UK). Major oxide content in the raw materials was analyzed using X-ray fluorescence (XRF, Rigaku ZSX Primus III+, Japan). The phase compositions of the ceramsite were analyzed using X-ray diffraction (XRD, Rigaku Ultima IV, Japan) with Cu-Kα radiation (40 kV, 40 mA, 5 – 90°, 1°/min, and a scan step of 0.02°) to determine the crystal structure. Selected ceramsite granules were ground in an agate mortar and analyzed using Fourier-transform infrared spectroscopy (FTIR, Thermo Scientific Nicolet iS50, USA) in the wavenumber range of approximately 400 – 4000 cm−1 and XPS (ULVAC-PHI PHI5000 VersaProbe III, Japan) using an Al Kα source (50 W, 15 kV, and 200 μm). Scanning electron microscopy (SEM, accelerating voltage of 12 kV) coupled with energy-dispersive X-ray spectrometry (SEM-EDS, JEOL JSM-6360 microscope, Japan) was used to determine the surface microstructure and elemental composition of ceramsite.

The morphological, physical, and chemical properties of ASC suggest that the material should have great potential for phosphate adsorption. The BET analysis of ASC in Figure S2A shows a Type IV isotherm with a typical H3 hysteresis loop (P/P0 < 0.5), which is characteristic of multilayer formation and capillary condensation behaviour, attributing to the presence of mesoporous structure (> 2 nm).6 Moreover, the pore size distribution of ASC was between 2 and 50 nm, with a peak at 7.7 nm (Figure S2B). The SSA and total pore volume of ASC were 70.53 m2/g and 0.23 cm3/g, respectively. The SSA and pore volume are large compared with ceramsite materials reported in the literature. Wang et al.’s ceramsite made from WTR and bentonite (7:3 wt) had a SSA of 45.4 m2/g,7 and the modified commercial ceramsite in Wu, et al. 8 had a pore size of 7.66 to 14.83 nm and a pore volume of 0.067 – 0.151 cm3/g. The ASC had a pHpzc at 8.2 (Figure S2C), indicating that its surface was positively charged at pH < 8.2 and negatively charged when pH > 8.2.9 The pHpzc of ASC may influence its adsorption performance under different pH conditions. XRD (Figure S2D) confirmed thatthe main crystalline phases were quartz (SiO2), muscovite (KAl2Si3AlO10(OH)2), albite (NaAlSi3O8), sanidine (KAlSi3AlO8), and a small amount of calcite (CaCO3). The abundant di-/tri-valent metals (i.e., Ca and Al) can serve as active adsorption sites for phosphate ions.10, 11 The two board XRD peaks at about 2θ values of 45.94 and 68.12° suggest a portion of amorphous or poorly crystalline SiO2, which can form a hydrated layer and benefit adsorption.12 SEM (Figures S2E & S3) showed a rough, irregular surface structure. on the ASC surface, which is in agreement with the BET analysis. EDS (Figure S2F) confirmed abundant O, Al, Si, Fe, and Ca on the material surface, supporting the XRD results. Therefore, the big SSA and pore volume and abundant di-/trivalent metals suggest that ASC can have great adsorption capacity.

# Text S6. Adsorption kinetics and isotherms.

***Adsorption kinetics:*** Adsorption experiments using three initial phosphate concentrations (i.e., 5, 30, and 50 mg PO43-/L) were conducted and fitted with four kinetic models (PFO, PSO, Elovich, and IPD) (Figure S 4A&B). These were very high concentrations in relation to environmental P levels. In Canada, water bodies with a total phosphorus (TP) of 0.035 – 0.100 mg P/L (equivalent to 0.107 – 0.306 mg PO43-/L) are categorized as eutrophic, and waters with a TP concentration > 0.100 mg P/L (> 0.306 mg PO43-/L) are hyper-eutrophic.13 The adsorption rates (%) for all three initial phosphate concentrations rapidly increased in the first 6 hrs and then stabilized beyond around 11 hrs (Figure S 4A). At 10℃, the maximum equilibrium adsorption capacity was 0.74, 4.22, and 8.13 mg PO43-/g, corresponding to a recovery rate of 97.6, 93.9, and 91.9%, respectively. The good fittings of the linearized PSO model (R2 of 0.9975 to 0.9993) and the Elovich model suggest the predominance of chemical adsorption via ligand exchange (Figure S4C and Figure S5).14 While the linearized PSO demonstrates the closest fit to the experimental data, all three non-linear kinetic models (i.e., PFO, PSO, and Elovich) describe the adsorption well (R2 = 0.9244 to 0.9907)(Table S 4), except for 5 mg PO43-/L. It may be ascribed to the difficulty in distinguishing the relative contributions of electrostatic attraction and chemisorption. At a high phosphate concentration, the adsorption sites on the ceramsite surface would easily reach saturation, allowing the dominant adsorption mechanism to be identified. Despite the ambiguity of the adsorption mechanism at the lower phosphate concentration (5 mg PO43-/L), the relatively higher R2 value of the PFO model (0.7345) signals the dominance of electrostatic interactions.15

The IPD model (Error: Reference source not foundB), which has been divided into multiple phases to illustrate linearized plots at different adsorption stages, further supports the dominance of chemical adsorption. None of the linearly fitted segments passes through the origin, suggesting that both film diffusion and intraparticle diffusion likely occurred.16 All the IPD adsorption rates of ASC in the first stage (kd,1) were higher than the second stage (kd,2)(Table S 4). During the first stage, the adsorption of phosphate onto the adsorbent surface was remarkably rapid, likely resulting from film diffusion through the hydrodynamic layer and diffusion through the boundary layer. Subsequently, the second stage was controlled by pore diffusion, resulting in a lower slope. XPS spectra suggest that multiple mechanisms may be involved in phosphate adsorption onto ASC, including chemical deposition, inner-sphere complexation, and ligand exchange. Detailed interpretation of the XPS results is provided in SI Text S8. Therefore, phosphateadsorption onto ASC was primarily driven by strong chemical adsorption between surface active sites (e.g., Al3+, Ca2+) and functional groups, but weak physical interactions cannot be ruled out.17, 18 To establish a quantitative understanding of the adsorption of ASC, systematic titration studies and mathematical models will be done to obtain more in-depth knowledge of the material, such as mineral composition, active sites, and their respective pKa values.

***Adsorption isotherms:*** The Langmuir, Freundlich, and Sips were used to fit the adsorption results (Figure S 4D). They are typical isotherms for phosphateadsorption.19 The Langmuir isotherm describes the monolayer dynamic equilibrium of adsorption and desorption, while the Freundlich isotherm is for multilayer adsorption onto heterogeneous surfaces. In comparison, the Sips isotherm model incorporates the adsorption characteristics of the Langmuir and Freundlich models to better describe adsorption behaviour in heterogeneous systems by introducing an adjustable parameter (i.e., m in Eq. S9).20, 21 The Sips isotherm can address the limitations of the Freundlich model, particularly at higher adsorbate concentrations.22 The adsorption parameters and values are summarized (Table S 5). The great fitting of the Freundlich isotherm (R2 > 0.9891) indicates a favourable phosphate adsorption environment, as evidenced by the n value (n = 2.83) being greater than 1 under the studied conditions.21 Overall, the Sips model best describes the adsorption, indicating the phosphate adsorption onto ceramsite was governed by a multilayer adsorption process, with active sites heterogeneously distributed on the ceramsite surface. According to the Sips model, the maximum absorption capacity of ASC at 10℃ is predicted to be 141.7 mg PO43-/g (47.23 mg P/g), which is encouraging.

# Text S7. FTIR spectra of ASC before and after phosphate adsorption.

Figure S 7 shows the FTIR spectra of ASC in the range of 4,000 – 400 cm-1 before and after phosphate adsorption. The wide peaks between 1,000 and 1,100 cm-1 are mainly attributed to the stretching of Si-O in amorphous silica.8 Moreover, the peaks at lower wave numbers (400 – 500 cm-1 and 780 – 795 cm-1) may be assigned to T-O vibrations (T: Si or Al) and the vibration of Si-O-Si in silicon oxygen tetrahedron, respectively.23 Also, the strengthened and shifted peak at around 1,019 cm-1 (to 1,030 cm-1 in spent ASC) after phosphate adsorption could be caused by the overlap of typical P-O asymmetry vibrations (peaked at 1,053 cm-1) with the original Si-O bond 24. Meanwhile, there was a new weak peak at around 544 cm-1 belonging to the vibration of P-O bond.25, 26 This suggests that the phosphate transferred from the solution onto the ASC adsorbent surface.

# Text S8. XPS spectra of ASC before and after phosphate adsorption.

The mechanisms governing the adsorption may include ligand exchange, precipitation, and inner-sphere complexation. Both FTIR (Figure S 7 and Text S7) and XPS were performed to confirm such an assumption. FTIR analyses clearly indicate the existence of phosphate on the ceramsite surface. Figure S 8A shows the full XPS spectra of the adsorbent before and after phosphate adsorption. Before adsorption, characteristic peaks corresponding to O 1s, C 1s, Ca 2p, and Al 2p were observed in the spectrum of ASC. The P 2p peak did not appear until after adsorption, indicating phosphate deposition on ASC. In Figure S 8B, the observed binding energy for P 2p was 133.6 eV, approximately 0.4 eV lower than the standard spectrum of KH2PO4 at 134.0 eV.27 This slight deviation underscores a transition of phosphate to lower energy levels, suggesting chemical interactions during adsorption, such as inner-sphere complexation between phosphate and adsorbent surface.28 The main P 2p peak deconvoluted into two peaks at 133.3 (2p1/2) and 134.2 eV (2p3/2), corresponding to PO43-.29, 30 The high-resolution C 1s spectrum for ASC is shown in Figure S 8C. Before phosphate adsorption, the peaks were located at 284.8 eV (C-H), 285.9 eV (C-O), and 289.05 eV (C=O). After phosphate was captured, the C-O and C=O peaks shifted to a higher energy level by 0.52 and 0.1 eV, respectively. Notably, the proportion of C-O decreased from 57.19 to 31.83%, while C-H and C=O increased from 39.73 to 64.12% and from 3.08 to 4.05%, respectively. Thus, oxygenated functional groups (e.g., carboxyl group) are presumed to play a critical role in the phosphate adsorption process of ASC.31 Besides, the O 1s spectrum was mainly composed of M-OH and M-O (Figure S 8D). The area ratio of M-O peak increased from 39.77 to 44.84%, while the percentage of M-OH exhibited a decrease of 5.07% after phosphate adsorption. The results further suggest that phosphate replaced -OH groups on the adsorbent surface, leading to ligand exchange and the formation of new species (e.g., M-P, M=Al, Si, Ca, or Fe).26 The Al 2p XPS spectra of ASC before and after phosphate adsorption are shown in Figure S 8E. The slight increase in Al 2p binding energy from 74.3 to 74.5 eV indicates a potential electron transfer within its valence band and the chemical interactions between the ceramsite and phosphate. However, due to the minimal shift between the binding energies of Al(OH)3 and Al-PO4, it is difficult to differentiate them based on the Al 2p spectrum.32 As shown in Figure S 8F, the calcium-binding energy could be deconvoluted into two major peaks (i.e., Ca 2p1/2 and Ca 2p3/2) and a satellite peak. After phosphate adsorption, the double peaks of CaCO3 uniformly shifted by 0.3 eV to higher values, indicating that the binding state of Ca has changed.33 This may be attributed to the newly formed precipitates between Ca2+ and phosphate (e.g., HPO42- and H2PO4-).31, 34 In summary, the XPS analysis suggests that phosphate adsorption of ASC may involve multiple mechanisms, including chemical deposition, inner-sphere complexation, and ligand exchange.


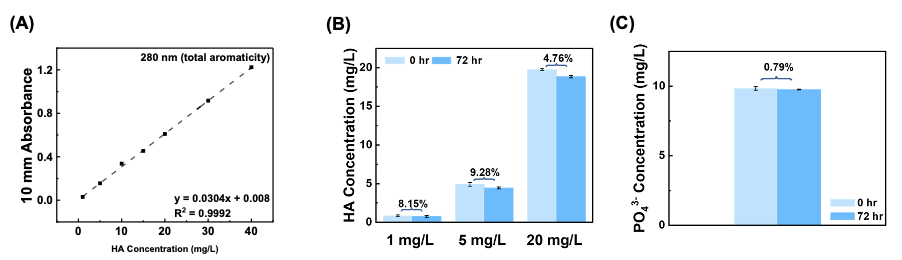


Figure S 1. The UV-vis standard curve built for HA (A). The concentrations of HA in the centrifuge tubes without ceramsite: prior to and after the adsorption experiments (B) and the concentrations of phosphate in the centrifuge tubes without ceramsite before and after the adsorption experiments (C).


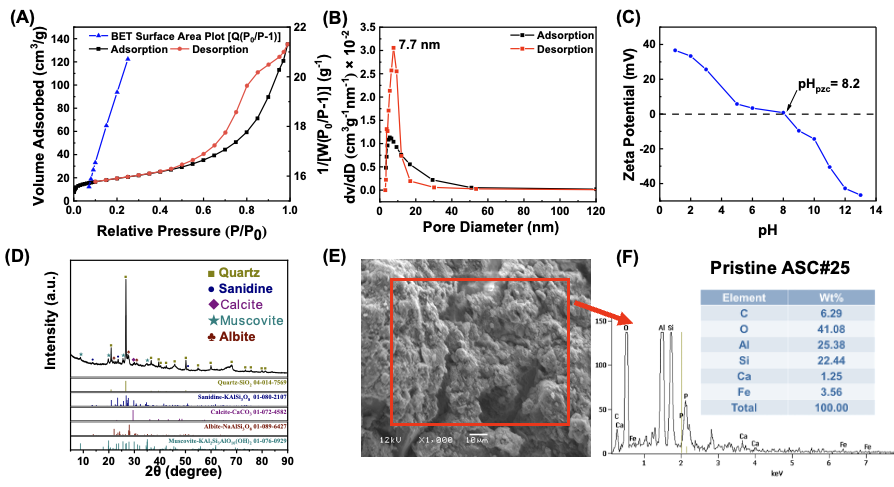


Figure S 2. N2 adsorption/desorption isotherm curves and BET-SSA diagram (A), the pore size distribution (B), surface zeta potentials, pHpzc (C), XRD spectra (D), SEM image (×1,000 times) (E), and EDS spectra of ASC (F).

| 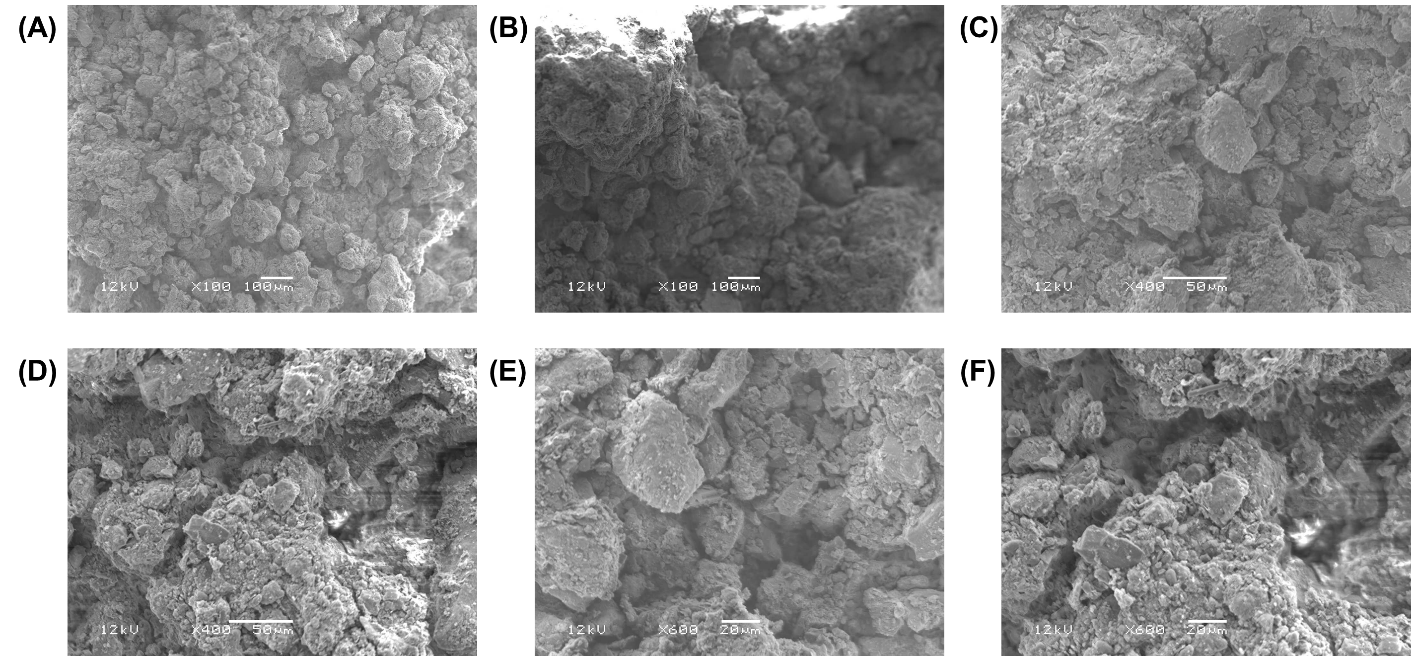  Figure S 3. SEM imagens of pristine ASC detailing at 100× (A-B), 400× (C-D), and 600× (E-F) times. |
| --- |
| | Figure S 4 Adsorption of phosphate by ASC: Adsorption kinetics fitted with PFO, PSO, and Elovich models (A), IPD model (B), linearized PSO fitting (C), and adsorption isotherms fitted with Langmuir, Freundlich, and Sips models (D). | | --- | |


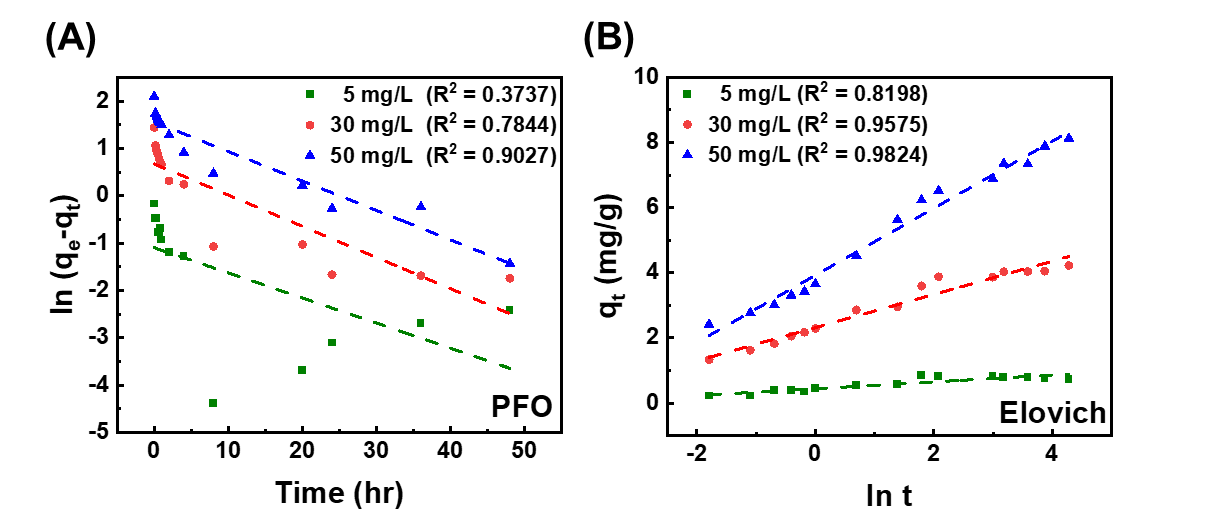


Figure S 5. Linearized PFO (A) and Elovich (B) model.

|  |
| --- |
| 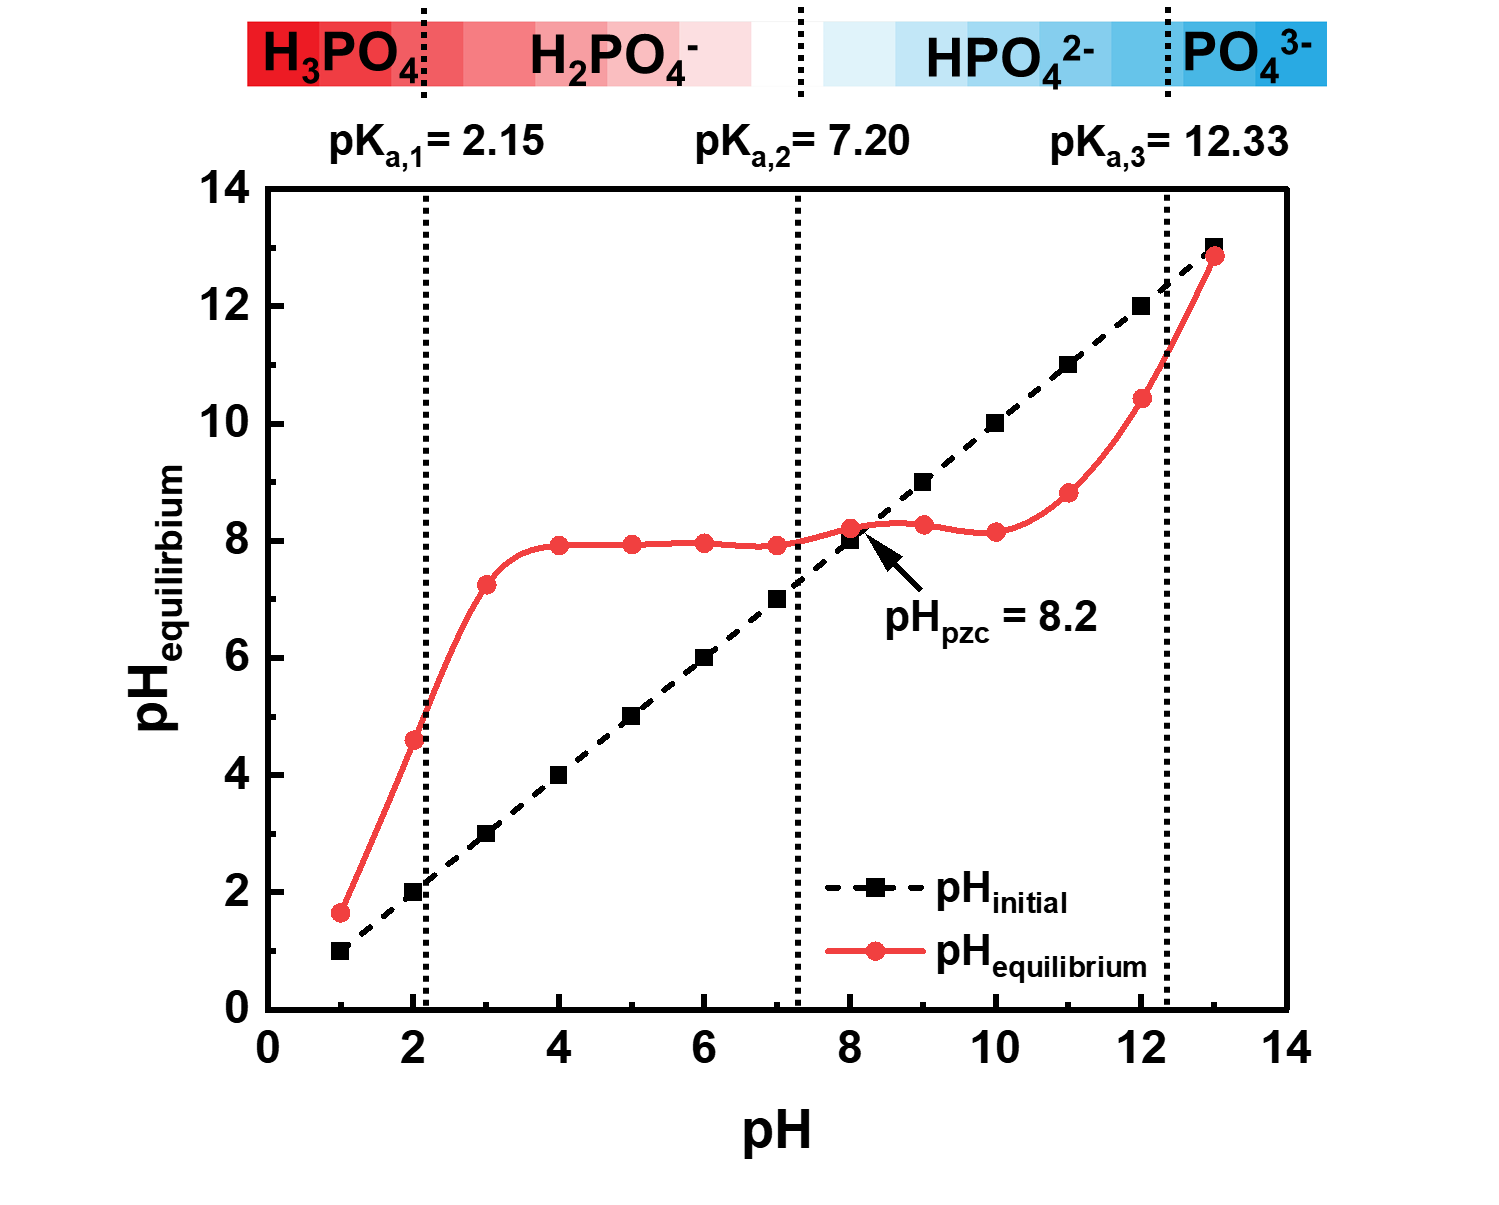  Figure S 6. Phosphate ion distribution and surface charge of ASC across different pH levels. |
|  |
| Figure S 7. FTIR spectra of ASC before and after phosphate adsorption.  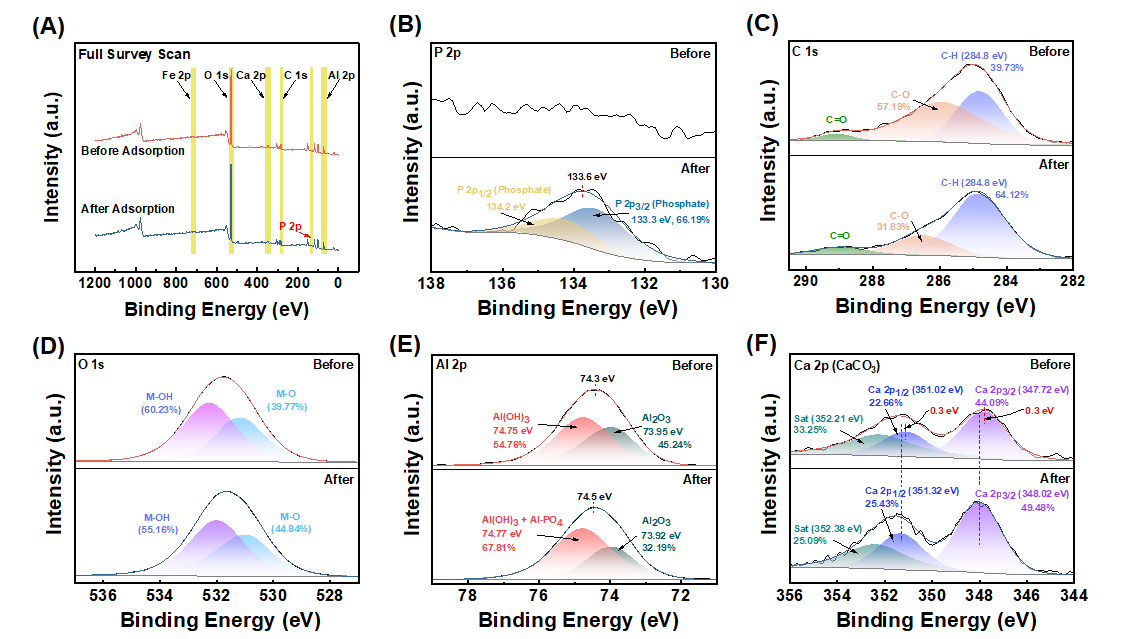  Figure S 8 XPS spectrum comparison of ASC before and after phosphate adsorption: full survey scan (A), P 2p (B), C 1s (C), O 1s (D), Al 2p (E), and Ca 2p (F). Operating conditions: pH = 7.5, operating temperature = 10℃, dosage = 6 g/L, 150 rpm, initial phosphate concentration = 300 mg/L, and contact time = 72 hrs. |

Table S 1. L27 (63) orthogonal test and resulting SSA values.

| Run | C1 | C2 | C3 | C4 | C5 | C6 | Response |
| --- | --- | --- | --- | --- | --- | --- | --- |
| SSA (m2/g) |
| 1 | 1 | 1 | 1 | 1 | 1 | 1 | 30.987 |
| 2 | 1 | 1 | 1 | 1 | 2 | 2 | 18.073 |
| 3 | 1 | 1 | 1 | 1 | 3 | 3 | 10.974 |
| 4 | 1 | 2 | 2 | 2 | 1 | 1 | 28.804 |
| 5 | 1 | 2 | 2 | 2 | 2 | 2 | 17.221 |
| 6 | 1 | 2 | 2 | 2 | 3 | 3 | 10.534 |
| 7 | 1 | 3 | 3 | 3 | 1 | 1 | 23.970 |
| 8 | 1 | 3 | 3 | 3 | 2 | 2 | 16.425 |
| 9 | 1 | 3 | 3 | 3 | 3 | 3 | 9.825 |
|  | | | | | | | |
| 10 | 2 | 1 | 2 | 3 | 1 | 2 | 42.341 |
| 11 | 2 | 1 | 2 | 3 | 2 | 3 | 27.875 |
| 12 | 2 | 1 | 2 | 3 | 3 | 1 | 17.156 |
| 13 | 2 | 2 | 3 | 1 | 1 | 2 | 51.228 |
| 14 | 2 | 2 | 3 | 1 | 2 | 3 | 17.553 |
| 15 | 2 | 2 | 3 | 1 | 3 | 1 | 18.785 |
| 16 | 2 | 3 | 1 | 2 | 1 | 2 | 47.010 |
| 17 | 2 | 3 | 1 | 2 | 2 | 3 | 28.195 |
| 18 | 2 | 3 | 1 | 2 | 3 | 1 | 17.362 |
|  | | | | | | | |
| 19 | 3 | 1 | 3 | 2 | 1 | 3 | 57.301 |
| 20 | 3 | 1 | 3 | 2 | 2 | 1 | 45.690 |
| 21 | 3 | 1 | 3 | 2 | 3 | 2 | 27.743 |
| 22 | 3 | 2 | 1 | 3 | 1 | 3 | 64.492 |
| 23 | 3 | 2 | 1 | 3 | 2 | 1 | 38.852 |
| 24 | 3 | 2 | 1 | 3 | 3 | 2 | 26.387 |
| 25 | 3 | 3 | 2 | 1 | 1 | 3 | 70.529 |
| 26 | 3 | 3 | 2 | 1 | 2 | 1 | 46.369 |
| 27 | 3 | 3 | 2 | 1 | 3 | 2 | 46.631 |

Note: **Bolded value** indicates the highest SSA response among all tested batches.

Table S 2. Response table for means and S/N ratios.

| Level | C1 | C2 | C3 | C4 | C5 | C6 |
| --- | --- | --- | --- | --- | --- | --- |
| Means | | | | | | |
| k1 | 18.53 | 30.90 | 31.37 | 34.57* | 46.30* | 29.78 |
| k2 | 29.72 | 30.43 | 34.16* | 31.10 | 28.47 | 32.56 |
| k3 | 47.11* | 34.04* | 29.84 | 29.70 | 20.60 | 33.03* |
| R | 28.58 | 3.61 | 4.33 | 4.87 | 25.70 | 3.26 |
| RANK | 1 | 5 | 4 | 3 | 2 | 6 |
| S/N Ratios | | | | | | |
| k1 | 24.65 | 28.79 | 28.82 | 29.33* | 32.79* | 28.87 |
| k2 | 28.66 | 28.37 | 29.35* | 28.76 | 28.36 | 29.45* |
| k3 | 33.03* | 29.18* | 28.17 | 28.25 | 25.19 | 28.02 |
| R | 8.38 | 0.81 | 1.18 | 1.08 | 7.60 | 1.42 |
| RANK | 1 | 6 | 4 | 5 | 2 | 3 |

Note: **Bolded values** with “*****” are the highest level of k value for each fabricating factor.

Table S 3. Heavy metal leaching concentration of ceramsite sintering at optimal sintering conditions and national standard limits for hazardous material identification.

| Heavy Metals (mg/L) | Cr | Pb | Cd | Cu | Ni | Zn | As | Ba | Be | Se | Ca | Al |
| --- | --- | --- | --- | --- | --- | --- | --- | --- | --- | --- | --- | --- |
| ASC | ND | 0.1 | ND | 0.2 | ND | 0.1 | ND | 0.9 | ND | ND | 83.4 | 527.8 |
| USEPA 35 | 15 | 5 | 1 | 100 | 5 | 10 | 5 | 100 | 0.02 | 1 | / | / |
| ND: within the detection limit. | | | | | | | | | | | | |
| The raw material mixture contains alum sludge and bentonite clay in 80:20 mass ratio. | | | | | | | | | | | | |

Table S 4. Adsorption kinetics of phosphate adsorption onto ASC.

| **Adsorption Kinetic Models** | **Parameters** | **Initial Concentrations (mg PO43-/L)** | | |
| --- | --- | --- | --- | --- |
| 5 | 30 | 50 |
| PFO | qe,1 | 0.7915 | 3.9829 | 7.4488 |
| k1 | 1.0384 | 1.0065 | 0.8084 |
| R2 | 0.7345 | 0.9515 | 0.9244 |
| PSO | qe,2 | 0.8049 | 4.0963 | 7.7685 |
| k2 | 3.8809 | 0.3546 | 0.1367 |
| R2 | 0.6007 | 0.9855 | 0.9620 |
| Elovich | α | 7.4488 | 7.7685 | 34.5276 |
| β | 48.4259 | 2.0713 | 0.9160 |
| R2 | 0.0646 | 0.9745 | 0.9907 |
| IPD | kd, 1 | 0.2332 | 0.9779 | 1.6995 |
| Cd, 1 | 0.1743 | 1.2182 | 1.8493 |
| (R1)2 | 0.9451 | 0.9671 | 0.9928 |
| kd, 2 | 0.0221 | 0.0739 | 0.2521 |
| Cd, 2 | 0.9072 | 3.5459 | 6.1193 |
| (R2)2 | 0.9689 | 0.8439 | 0.9593 |

Table S 5 Parameters and values derived from adsorption isotherm models in the phosphate adsorption onto ASC.

| **Adsorption Isotherms** | **Parameters** | **Value** |
| --- | --- | --- |
| Langmuir | qmax | 53.64 |
| kL | 3.29×10-3 |
| R2 | 0.9503 |
| Freundlich | kf | 4.3108 |
| n | 2.83 |
| R2 | 0.9891 |
| Slips | qmax | 141.70 |
| kS | 2.94×10-4 |
| m | 2.00 |
| R2 | 0.9949 |

Table S 6. Thermodynamic parameters for the phosphate adsorption onto ASC at different temperatures (10, 20, and 30℃) and different concentrations (10, 50, and 100 mg/L).

| T (K) | kd | ΔG (kJ/mol) | ΔH (kJ/mol) | ΔS (J/(mol·K)) |
| --- | --- | --- | --- | --- |
| 10 mg/L | | | | |
| 283.15 | 392.13 | -14.06 | 7.54 | 85.79 |
| 293.15 | 408.53 | -14.65 |
| 303.15 | 485.11 | -15.59 |
| 50 mg/L | | | | |
| 283.15 | 119.53 | -11.26 | 9.83 | 127.81 |
| 293.15 | 94.07 | -11.07 |
| 303.15 | 158.82 | -12.77 |
| 100 mg/L | | | | |
| 283.15 | 11.40 | -5.73 | 37.17 | 175.69 |
| 293.15 | 23.08 | -7.65 |
| 303.15 | 32.18 | -8.75 |

Table S 7. A comparison of ASC with other types of ceramsite in the literature.

| **Adsorbents** | **Specific Surface Area (m2/g)** | **pH** | **Temperature (℃)** | **Experimental Maximum Adsorption Capacity**  **(mg-P/g)** | **Predicted Maximum Adsorption Capacity**  **(mg-P/g)** | **Reference** |  | | | |
| --- | --- | --- | --- | --- | --- | --- | --- | --- | --- | --- |
|  | **Pristine Ceramsite** | | | | | |  | | | |
| ASC in this work | 70.53 | 7.5 | 10 | 14.30 | 47.23 | This work |  | | | |
| CFA/WS/OS ceramsite | / | 7.0 | 35 | 4.27 | 4.51  3.48 | Cheng, Li, et al. 10 |  | | | |
| Korean red mud ceramsite | 2.3 | 6.8 ± 0.3 | 10 | 5.27 | 4.95 | Lin, Li, et al. 18 |  | | | |
| American red mud ceramsite | 24.2 | 5.41 | 5.04 |  | | | |
| Slag ceramsite | 12.50 | 7.6 – 11.0 | Room Temp. | 10.50 | / | Liu, Yang, et al. 29 |  | | | |
| Regolith granite and P tailings ceramsite | 4.71 | 7.0 | 15 | 11.05 | 19.16 | Xiao, Fan, et al. 34 |  | | | |
|  | **Modified Ceramsite** | | | | | |  |  |  | 19.16 |
| FeSO4+KMnO4-modified ceramsite | 38.99 | 7.0 | 15 | 2.75 | 2.75 | Wu, Liu, et al. 8 |  | | | |
| Mg-modified ceramsite | 8.98 | 6.0 | 25 | 10.24 | 11.14 | Li, Cai, et al. 19 |  | | | |
| Zn/Fe-layered double hydroxide-modified ceramsite | / | 7.0 | 25 | 7.06 | 11.2 | Liu, et al. 36 |  | | | |
| La-modified bio-ceramsite | 4.55 | 7.0 ± 0.2 | / | 2.72 | 2.72 | Liu, et al. 37 |  | | | |

Table S 8. Quality parameters of the real municipal wastewater.

| **Parameter** | **Initial** | **Final** | **Removal, %** |
| --- | --- | --- | --- |
| pH | 7.52 | 8.09 | - |
| COD (mg/L) | 548.50 | 158.17 | 71.16 |
| PO43− (mg/L) | 35.47 | 1.02 | 97.13 |
| NH4+ (mg/L) | 45.92 | 38.60 | 15.94 |
| NO3− (mg/L) | 1.75 | 0.85 | 51.43 |

**Reference**

(1) Simonin, J.-P. On the comparison of pseudo-first order and pseudo-second order rate laws in the modeling of adsorption kinetics. *Chemical Engineering Journal* **2016**, *300*, 254-263. Weber Jr, W. J.; Morris, J. C. Kinetics of adsorption on carbon from solution. *Journal of the sanitary engineering division* **1963**, *89* (2), 31-59.

(2) Mezenner, N. Y.; Bensmaili, A. Kinetics and thermodynamic study of phosphate adsorption on iron hydroxide-eggshell waste. *Chemical Engineering Journal* **2009**, *147* (2-3), 87-96.

(3) Roy, R. K. *A primer on the Taguchi method*; Society of manufacturing engineers, 2010.

(4) Mi, H.; Yi, L.; Wu, Q.; Xia, J.; Zhang, B. Preparation of high-strength ceramsite from red mud, fly ash, and bentonite. *Ceramics International* **2021**, *47* (13), 18218-18229. Xu, G.; Zou, J.; Li, G. Effect of sintering temperature on the characteristics of sludge ceramsite. *Journal of hazardous materials* **2008**, *150* (2), 394-400.

(5) Lopez-Ramon, M. V.; Stoeckli, F.; Moreno-Castilla, C.; Carrasco-Marin, F. On the characterization of acidic and basic surface sites on carbons by various techniques. *Carbon* **1999**, *37* (8), 1215-1221.

(6) Sing, K. S.; Williams, R. T. Physisorption hysteresis loops and the characterization of nanoporous materials. *Adsorption Science & Technology* **2004**, *22* (10), 773-782.

(7) Wang, C.; Huang, C.; Xu, H.; Yuan, N.; Liu, X.; Bai, L.; He, X.; Liu, R. Ceramsite production using water treatment residue as main ingredient: The key affecting factors identification. *Journal of Environmental Management* **2022**, *308*, 114611.

(8) Wu, L.; Liu, C.; Hu, Y.; Tan, B.; He, Y.; Li, N. Dephosphorization using ceramsites modified by coprecipitation with FeSo4 and KMnO4 and high-temperature combustion. *Journal of Water Process Engineering* **2020**, *34*, 101162.

(9) Luo, H.; Wan, Y.; Cai, Y.; Dang, Z.; Yin, H. Enhanced phosphate adsorption by mg-stirred leaf biochar in a complex water matrix via active MgO facet exposure. *ACS ES&T Engineering* **2022**, *2* (12), 2254-2265.

(10) Cheng, G.; Li, Q.; Su, Z.; Sheng, S.; Fu, J. Preparation, optimization, and application of sustainable ceramsite substrate from coal fly ash/waterworks sludge/oyster shell for phosphorus immobilization in constructed wetlands. *Journal of Cleaner Production* **2018**, *175*, 572-581.

(11) Wang, S.; Kong, L.; Long, J.; Su, M.; Diao, Z.; Chang, X.; Chen, D.; Song, G.; Shih, K. Adsorption of phosphorus by calcium-flour biochar: Isotherm, kinetic and transformation studies. *Chemosphere* **2018**, *195*, 666-672.

(12) Su, Y.; Cui, H.; Li, Q.; Gao, S.; Shang, J. K. Strong adsorption of phosphate by amorphous zirconium oxide nanoparticles. *Water Research* **2013**, *47* (14), 5018-5026. Long, F.; Gong, J.-L.; Zeng, G.-M.; Chen, L.; Wang, X.-Y.; Deng, J.-H.; Niu, Q.-Y.; Zhang, H.-Y.; Zhang, X.-R. Removal of phosphate from aqueous solution by magnetic Fe–Zr binary oxide. *Chemical Engineering Journal* **2011**, *171* (2), 448-455. Wu, B.; Wan, J.; Zhang, Y.; Pan, B.; Lo, I. M. Selective phosphate removal from water and wastewater using sorption: process fundamentals and removal mechanisms. *Environmental Science & Technology* **2019**, *54* (1), 50-66.

(13) Water Science and Technology Directorate. *Water quality status and trends of nutrients in major drainage areas of Canada*

*Technical Summary*; Environment Canada, 2011.

(14) Lima, É. C.; Adebayo, M. A.; Machado, F. M. Kinetic and equilibrium models of adsorption. *Carbon Nanomaterials as Adsorbents for Environmental and Biological Applications* **2015**, 33-69.

(15) Zhao, C.; Zhang, W.; Zhang, Y.; Yang, Y.; Guo, D.; Liu, W.; Liu, L. Influence of multivalent background ions competition adsorption on the adsorption behavior of azo dye molecules and removal mechanism: Based on machine learning, DFT and experiments. *Separation and Purification Technology* **2024**, 126810.

(16) Bolbol, H.; Fekri, M.; Hejazi-Mehrizi, M. Layered double hydroxide–loaded biochar as a sorbent for the removal of aquatic phosphorus: behavior and mechanism insights. *Arabian Journal of Geosciences* **2019**, *12*, 1-11. Jung, K.-W.; Lee, S.; Lee, Y. J. Synthesis of novel magnesium ferrite (MgFe2O4)/biochar magnetic composites and its adsorption behavior for phosphate in aqueous solutions. *Bioresource Technology* **2017**, *245*, 751-759.

(17) Ma, Y.; Zhu, J.; Yu, J.; Fu, Y.; Gong, C.; Huang, X. Adsorption Characteristics of Phosphate Based on Al-Doped Waste Ceramsite: Batch and Column Experiments. *International Journal of Environmental Research and Public Health* **2022**, *20* (1), 671.

(18) Lin, J.-Y.; Li, D.; Kim, M.; Lee, I.; Kim, H.; Huang, C.-P. Process optimization for the synthesis of ceramsites in terms of mechanical strength and phosphate adsorption capacity. *Chemosphere* **2021**, *278*, 130239.

(19) Li, W.; Cai, G.; Luo, K.; Zhang, J.; Li, H.; Li, G.; Zhang, J.; Chen, X.; Xie, F. Synthesis of magnesium-modified ceramsite from iron tailings as efficient adsorbent for phosphorus removal. *Separation and Purification Technology* **2023**, *326*, 124817.

(20) Yan, B.; Munoz, G.; Sauvé, S.; Liu, J. Molecular mechanisms of per-and polyfluoroalkyl substances on a modified clay: a combined experimental and molecular simulation study. *Water Research* **2020**, *184*, 116166.

(21) Hu, Q.; Lan, R.; He, L.; Liu, H.; Pei, X. A critical review of adsorption isotherm models for aqueous contaminants: Curve characteristics, site energy distribution and common controversies. *Journal of Environmental Management* **2023**, *329*, 117104.

(22) Tzabar, N.; Ter Brake, H. Adsorption isotherms and Sips models of nitrogen, methane, ethane, and propane on commercial activated carbons and polyvinylidene chloride. *Adsorption* **2016**, *22*, 901-914.

(23) Alkan, M.; Hopa, Ç.; Yilmaz, Z.; Güler, H. The effect of alkali concentration and solid/liquid ratio on the hydrothermal synthesis of zeolite NaA from natural kaolinite. *Microporous and Mesoporous Materials* **2005**, *86* (1-3), 176-184. Zhao, D.; Qiu, S.-k.; Li, M.-m.; Luo, Y.; Zhang, L.-s.; Feng, M.-h.; Yuan, M.-y.; Zhang, K.-q.; Wang, F. Modified biochar improves the storage capacity and adsorption affinity of organic phosphorus in soil. *Environmental Research* **2022**, *205*, 112455.

(24) Wang, B.; Zhang, H.; Hu, X.; Chen, R.; Guo, W.; Wang, H.; Wang, C.; Yuan, J.; Chen, L.; Xia, S. Efficient phosphate elimination from aqueous media by La/Fe bimetallic modified bentonite: Adsorption behavior and inner mechanism. *Chemosphere* **2023**, *312*, 137149.

(25) Wang, L.; Wang, J.; Yan, W.; He, C.; Shi, Y. MgFe2O4-biochar based lanthanum alginate beads for advanced phosphate removal. *Chemical Engineering Journal* **2020**, *387*, 123305.

(26) Shi, W.; Fu, Y.; Jiang, W.; Ye, Y.; Kang, J.; Liu, D.; Ren, Y.; Li, D.; Luo, C.; Xu, Z. Enhanced phosphate removal by zeolite loaded with Mg–Al–La ternary (hydr) oxides from aqueous solutions: performance and mechanism. *Chemical Engineering Journal* **2019**, *357*, 33-44.

(27) Wang, B.; Hu, X.; Li, L.; Wang, H.; Huang, H.; Wang, R.; Zhou, D.; Yuan, J.; Chen, L. Application and functionalization of toxic waste sludge-derived biochar for efficient phosphate separation from aqueous media: toxicity diminution, robust adsorption, and inner mechanism. *Chemical Engineering Journal* **2023**, 143745.

(28) Shao, Q.; Zhang, Y.; Liu, Z.; Long, L.; Liu, Z.; Chen, Y.; Hu, X.-M.; Lu, M.; Huang, L.-Z. Phosphorus and nitrogen recovery from wastewater by ceramsite: Adsorption mechanism, plant cultivation and sustainability analysis. *Science of the Total Environment* **2022**, *805*, 150288.

(29) Liu, X.; Yang, S.; Liu, S.; Yang, Y. Performance and mechanism of phosphorus removal by slag ceramsite filler. *Process Safety and Environmental Protection* **2021**, *148*, 858-866.

(30) Zheng, J.; Han, Y.; Wei, L.; Li, M.; Zhu, L. Sludge-derived biopolymers for in-situ synthesis of magnetic ALE-Fe-Zr composites for phosphate removal. *Chemical Engineering Journal* **2023**, *456*, 140842. Pan, F.; Wei, H.; Huang, Y.; Song, J.; Gao, M.; Zhang, Z.; Teng, R.; Jing, S. Phosphorus adsorption by calcium chloride-modified buckwheat hulls biochar and the potential application as a fertilizer. *Journal of Cleaner Production* **2024**, 141233.

(31) Zhuo, S.-N.; Dai, T.-C.; Ren, H.-Y.; Liu, B.-F. Simultaneous adsorption of phosphate and tetracycline by calcium modified corn stover biochar: Performance and mechanism. *Bioresource Technology* **2022**, *359*, 127477.

(32) Li, X.; Yu, D.; Su, L.; Pei, Y. Facile method to granulate drinking water treatment residues as a potential media for phosphate removal. *Colloids and Surfaces A: Physicochemical and Engineering Aspects* **2020**, *586*, 124198.

(33) Yu, J.; Li, X.; Wu, M.; Lin, K.; Xu, L.; Zeng, T.; Shi, H.; Zhang, M. Synergistic role of inherent calcium and iron minerals in paper mill sludge biochar for phosphate adsorption. *Science of The Total Environment* **2022**, *834*, 155193.

(34) Xiao, T.; Fan, X.; Wang, H.; Zeng, Z.; Tian, Z.; Zhou, H. Removal of phosphorus from water bodies using high-performance ceramsite prepared from solid wastes. *Separation and Purification Technology* **2024**, 126962.

(35) USEPA. SW-846 Chapter Seven: Characteristics Introduction and Regulatory Definitions (revision 4). In *U S Environmental Protection Agency, Washington DC*, 2004.

(36) Liu, F.; Liang, X.; He, S.; Li, F.; Jin, Y.; Zhao, Z.; Zhu, L. Performance of a new low-cost Zn/Fe-layered double hydroxide-modified ceramsite for the removal of P from agricultural runoff. *Ecological Engineering* **2021**, *159*, 106117.

(37) Liu, M.; Wang, C.; Guo, J.; Zhang, L. Removal of phosphate from wastewater by lanthanum modified bio-ceramisite. *Journal of Environmental Chemical Engineering* **2021**, *9* (5), 106123.
